# Supplementary material for: One-step seeding growth of controllable Ag@Ni core–shell nanoparticles on skin collagen fiber with introduction of plant tannin and their application in high-performance microwave absorption
Source: Royal Society of Chemistry journal article supplement (doi:10.1039/c2jm30370a), 2012-01-01
Supplement: c2jm30370a.pdf [file c2jm30370a.pdf]

# One-step seeding growth of controllable Ag@Ni core-shell nanoparticles on skin collagen fiber with introduction of plant tannin and their application in high-performance microwave absorption

Junling Guo, Xiaoling Wang, Penglong Miao, Xuepin Liao,\* Wenhua Zhang and Bi Shi\*

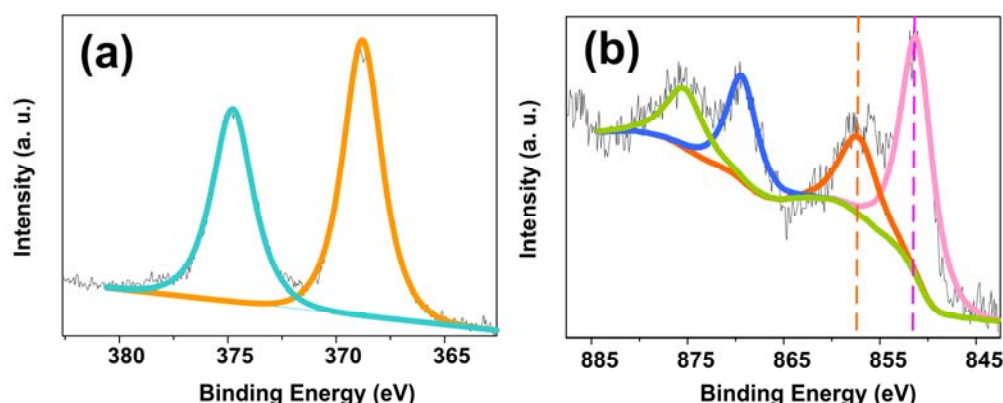

Figure S1 Ag 3d (a) and Ni 2p (b) XPS spectra of Ag<sub>1</sub>@Ni<sub>1</sub>/SCF-BT<sub>0.35</sub>.

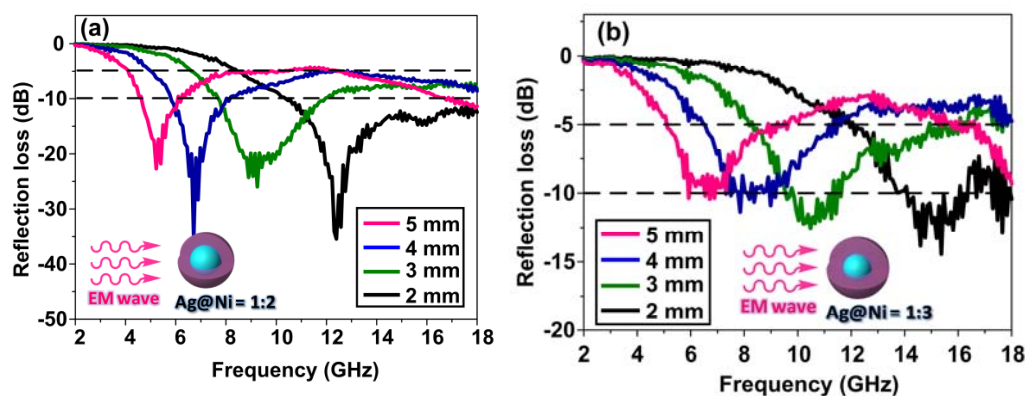

Figure S2. Microwave reflection losses (RL) of (a) Ag<sub>1</sub>@Ni<sub>2</sub>/SCF-BT<sub>0.35</sub> (b), Ag<sub>1</sub>@Ni<sub>3</sub>/SCF-BT<sub>0.35</sub> with different thicknesses from 2.0 to 5.0 mm

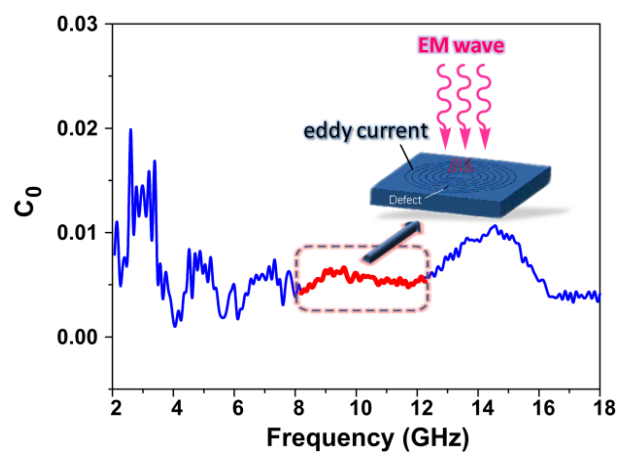

**Figure S3.** Frequency dependence of  $C_0$ - $f$  curve for  $\text{Ag}_1@ \text{Ni}_1/\text{SCF-BT}_{0.35}$ .
